# Supplementary material for: Abnormally Increased Secretion in Olfactory Neuronal Precursors from a Case of Schizophrenia Is Modulated by Melatonin: A Pilot Study
Source: MDPI journal article supplement (doi:10.3390/ijms18071439), 2017-07-13
Supplement: s1 [file s1]

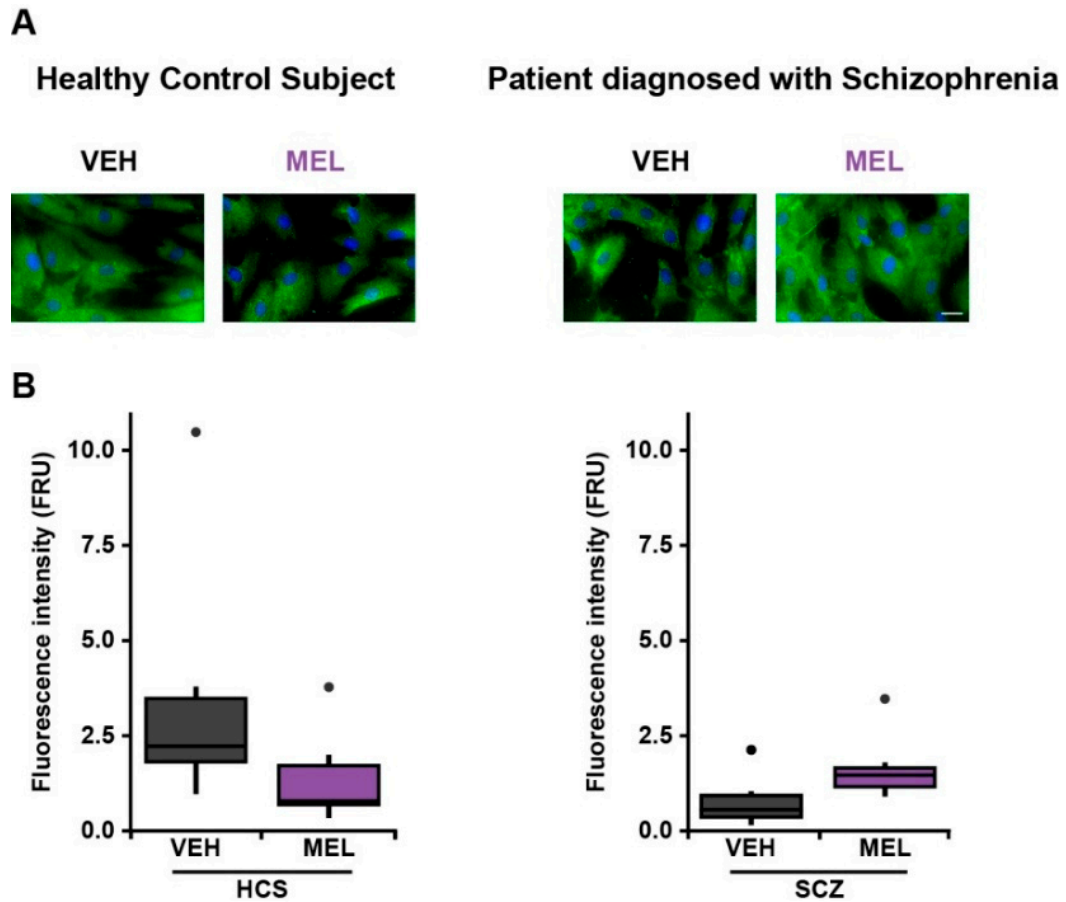

**Figure S1.** Evaluation of VAMP1/2-immunofluorescence intensity in ONPs obtained from HCS and SCZ subjects. ONPs were primary cultured up to passage 5 before immunostaining with a VAMP1/2 antibody followed by a FITC-conjugated secondary antibody. **(A)** Representative images of ONPs from HCS (**left**) and SCZ subjects (**right**) incubated with either the vehicle (VEH) or melatonin (MEL). Scale bar: 10  $\mu$ m; **(B)** box plots of the corresponding data obtained from 6 visual fields for each condition; dots indicate the outliers. Statistical analysis was done by one way ANOVA. Differences between groups were not significant.
